# Supplementary material
Source: PubMed Central journal article supplement (PMC2875841)
Supplement: supp_137.12.1981_DEV048439tableS1.pdf [file supp_137.12.1981_DEV048439tableS1.pdf]

Table S1. Microarray results

| PROBE_ID           | Fold change | control | ovo1MO | Target Description                                                                                                                                                                                                                                              | Gene Title                                                        | Gene Symbol |
|--------------------|-------------|---------|--------|-----------------------------------------------------------------------------------------------------------------------------------------------------------------------------------------------------------------------------------------------------------------|-------------------------------------------------------------------|-------------|
| Dr.23587.1.A1_at   | 33.858 up   | 3.84107 | 8.9225 | gb:CD283598 /DB_XREF=gi:31061374 /DB_XREF=G38814.48 /CLONE=IMAGE:6524195 /TID=Dr.23587.1 /CNT=2 /FEA=EST /TIER=ConsEnd /STK=2 /UG=Dr.23587 /UG_TITLE=Danio rerio transcribed sequences                                                                          | growth arrest and DNA-damage-inducible, alpha like                | gadd45al    |
| Dr.17659.1.S1_at   | 25.622 up   | 5.04604 | 9.7254 | gb:BQ075086 /DB_XREF=gi:19904123 /DB_XREF=fz27c03.x1 /TID=Dr.17659.1 /CNT=5 /FEA=EST /TIER=ConsEnd /STK=1 /UG=Dr.17659 /UG_TITLE=Danio rerio transcribed sequence with weak similarity to protein pir:UQHUB (H.sapiens) UQHUB polyubiquitin 3 - human           | similar to ubiquitin-like protein 1                               | LOC558956   |
| Dr.12986.1.A1_a_at | 18.304 up   | 5.90184 | 10.096 | gb:BI881979 /DB_XREF=gi:16089250 /DB_XREF=fm87c11.x1 /CLONE=IMAGE:4467836 /TID=Dr.12986.1 /CNT=4 /FEA=EST /TIER=ConsEnd /STK=2 /UG=Dr.12986 /UG_TITLE=Danio rerio transcribed sequence with weak similarity to protein sp:P01100 (H.sapiens) FOS_HUMAN Proto-on | v-fos FBJ murine osteosarcoma viral oncogene homolog              | fos         |
| Dr.17659.1.S1_at   | 25.622 up   | 5.04604 | 9.7254 | gb:BQ075086 /DB_XREF=gi:19904123 /DB_XREF=fz27c03.x1 /TID=Dr.17659.1 /CNT=5 /FEA=EST /TIER=ConsEnd /STK=1 /UG=Dr.17659 /UG_TITLE=Danio rerio transcribed sequence with weak similarity to protein pir:UQHUB (H.sapiens) UQHUB polyubiquitin 3 - human           | similar to ubiquitin-like protein 1                               | LOC558956   |
| Dr.12986.1.A1_a_at | 18.304 up   | 5.90184 | 10.096 | gb:BI881979 /DB_XREF=gi:16089250 /DB_XREF=fm87c11.x1 /CLONE=IMAGE:4467836 /TID=Dr.12986.1 /CNT=4 /FEA=EST /TIER=ConsEnd /STK=2 /UG=Dr.12986 /UG_TITLE=Danio rerio transcribed sequence with weak similarity to protein sp:P01100 (H.sapiens) FOS_HUMAN Proto-on | v-fos FBJ murine osteosarcoma viral oncogene homolog              | fos         |
| Dr.11242.1.A1_at   | 16.725 up   | 7.00256 | 11.067 | gb:BG306206 /DB_XREF=gi:13103733 /DB_XREF=fm53f11.x1 /CLONE=IMAGE:4199204 /TID=Dr.11242.1 /CNT=1 /FEA=EST /TIER=ConsEnd /STK=1 /UG=Dr.11242 /UG_TITLE=Danio rerio transcribed sequence with weak similarity to protein pir:S58222 (H.sapiens) S58222 PQ-rich pr | pleckstrin homology-like domain, family A, member 3               | phlda3      |
| Dr.11481.1.A1_at   | 14.813 up   | 4.31628 | 8.2052 | gb:BM957970 /DB_XREF=gi:19541400 /DB_XREF=fy71e12.x1 /CLONE=IMAGE:5605343 /TID=Dr.11481.1 /CNT=5 /FEA=EST /TIER=ConsEnd /STK=3 /UG=Dr.11481 /UG_TITLE=Danio rerio transcribed sequences                                                                         | zgc:92153 (R-spondin-1 precursor (Roof plate-specific spondin-1)) | zgc:92153   |
| Dr.12986.1.A1_at   | 13.242 up   | 5.14744 | 8.8746 | gb:BI881979 /DB_XREF=gi:16089250 /DB_XREF=fm87c11.x1 /CLONE=IMAGE:4467836 /TID=Dr.12986.1 /CNT=4 /FEA=EST /TIER=ConsEnd /STK=2 /UG=Dr.12986 /UG_TITLE=Danio rerio transcribed sequence with weak similarity to protein sp:P01100 (H.sapiens) FOS_HUMAN Proto-on | v-fos FBJ murine osteosarcoma viral oncogene homolog              | fos         |
| Dr.11479.1.A1_at   | 12.876 up   | 5.14344 | 8.8301 | gb:BI866375 /DB_XREF=gi:16059508 /DB_XREF=fq44e08.x1 /CLONE=IMAGE:4834286 /TID=Dr.11479.1 /CNT=3 /FEA=EST /TIER=ConsEnd /STK=1 /UG=Dr.11479 /UG_TITLE=Danio rerio transcribed sequences                                                                         | ligand of numb-protein X 1                                        | inx1        |
| Dr.10334.1.S1_at   | 12.574 up   | 5.59679 | 9.2492 | gb:NM_131510.1 /DB_XREF=gi:18858386 /GEN=casp8 /TID=Dr.10334.1 /CNT=5 /FEA=FLmRNA /TIER=FL /STK=2 /LL=58022 /UG=Dr.10334 /DEF=Danio rerio caspase 8 (casp8), mRNA. /PROD=caspase 8 /FL=gb:NM_131510.1 gb:AF273220.1                                             | caspase 8, apoptosis-related cysteine peptidase                   | casp8       |
| Dr.12986.3.S1_a_at | 12.544 up   | 5.87288 | 9.5219 | gb:BM957279 /DB_XREF=gi:19540709 /DB_XREF=fy76c05.y1 /CLONE=IMAGE:5776904 /TID=Dr.12986.3 /CNT=1 /FEA=EST /TIER=ConsEnd /STK=0 /UG=Dr.12986 /UG_TITLE=Danio rerio transcribed sequence with weak similarity to protein sp:P01100 (H.sapiens) FOS_HUMAN Proto-on | v-fos FBJ murine osteosarcoma viral oncogene homolog              | fos         |

|                  |           |         |        |                                                                                                                                                                                                                                                                 |                                                      |              |
|------------------|-----------|---------|--------|-----------------------------------------------------------------------------------------------------------------------------------------------------------------------------------------------------------------------------------------------------------------|------------------------------------------------------|--------------|
| Dr.8209.1.S2_at  | 12.273 up | 7.59236 | 11.21  | gb:NM_131085.1 /DB_XREF=gi:18858710 /GEN=foxo5 /TID=Dr.8209.1 /CNT=9 /FEA=FLmRNA /TIER=FL /STK=2 /LL=30296 /UG=Dr.8209 /DEF=Danio rerio forkhead box O5 (foxo5), mRNA. /PROD=forkhead box O5 /FL=gb:NM_131085.1 gb:AF114262.1 gb:AF064828.1                     | forkhead box O5                                      | foxo5        |
| Dr.12986.2.S1_at | 11.648 up | 5.49613 | 9.0382 | gb:CA787334 /DB_XREF=gi:26030275 /DB_XREF=AGENCOURT_11031335 /CLONE=IMAGE:6805649 /TID=Dr.12986.2 /CNT=5 /FEA=EST /TIER=ConsEnd /STK=0 /UG=Dr.12986 /UG_TITLE=Danio rerio transcribed sequence with weak similarity to protein sp:P01100 (H.sapiens) FOS_HUMAN  | v-fos FBJ murine osteosarcoma viral oncogene homolog | fos          |
| Dr.8209.1.S1_at  | 10.144 up | 5.34028 | 8.683  | gb:AF064828.1 /DB_XREF=gi:5823003 /TID=Dr.8209.1 /CNT=9 /FEA=FLmRNA /TIER=FL /STK=1 /LL=30296 /UG_GENE=foxo5 /UG=Dr.8209 /DEF=Danio rerio putative fork head domain protein mRNA, complete cds. /PROD=putative fork head domain protein /FL=gb:NM_131085.1 gb:A | forkhead box O5                                      | foxo5        |
| Dr.3148.2.A1_at  | 9.765 up  | -1.1689 | 2.1187 | gb:AL728275 /DB_XREF=gi:20192879 /DB_XREF=AL728275 /CLONE=BN0AA098ZG02 /TID=Dr.3148.2 /CNT=10 /FEA=EST /TIER=ConsEnd /STK=5 /UG=Dr.3148 /UG_TITLE=Danio rerio transcribed sequence with weak similarity to protein ref:NP_115896.1 (H.sapiens) cerebral protein |                                                      |              |
| Dr.13415.1.S1_at | 8.383 up  | 0.05142 | 3.1189 | gb:BI865065 /DB_XREF=gi:16058198 /DB_XREF=ft19g03.y1 /CLONE=IMAGE:5082052 /TID=Dr.13415.1 /CNT=4 /FEA=EST /TIER=ConsEnd /STK=2 /UG=Dr.13415 /UG_TITLE=Danio rerio transcribed sequences                                                                         | Transcribed locus                                    |              |
| Dr.6419.1.A1_at  | 7.780 up  | 7.38602 | 10.346 | gb:BI430331 /DB_XREF=gi:15207563 /DB_XREF=fr86f08.x1 /CLONE=IMAGE:4967583 /TID=Dr.6419.1 /CNT=17 /FEA=EST /TIER=Stack /STK=13 /UG=Dr.6419 /UG_TITLE=Danio rerio transcribed sequence with moderate similarity to protein sp:O15440 (H.sapiens) MRP5_HUMAN Multi | similar to multidrug resistance protein (MRP5)       | LOC796249    |
| Dr.19223.1.S2_at | 7.721 up  | 4.98121 | 7.9301 | gb:BC053192.1 /DB_XREF=gi:31418841 /TID=Dr.19223.1 /CNT=271 /FEA=FLmRNA /TIER=FL+Stack /STK=102 /UG=Dr.19223 /DEF=Danio rerio cDNA clone MGC:64004 IMAGE:6792738, complete cds. /PROD=Unknown (protein for MGC:64004) /FL=gb:AF533647.1 gb:BC053192.1           | aldolase c, fructose-bisphosphate                    | aldoc        |
| Dr.542.1.S1_at   | 6.793 up  | 9.68877 | 12.453 | gb:AF356346.1 /DB_XREF=gi:19879918 /TID=Dr.542.1 /CNT=17 /FEA=FLmRNA /TIER=FL /STK=1 /LL=30637 /UG_GENE=mdm2 /UG=Dr.542 /DEF=Danio rerio Mdm2-like protein mRNA, complete cds. /PROD=Mdm2-like protein /FL=gb:AF356346.1 gb:NM_131364.1 gb:AF010255.1           | murine double minute 2 homolog (an E3 ubiq ligase)   | mdm2         |
| Dr.10111.1.A1_at | 6.595 up  | 4.67468 | 7.3962 | gb:BE201746 /DB_XREF=gi:8713920 /DB_XREF=fk98a06.x1 /TID=Dr.10111.1 /CNT=2 /FEA=EST /TIER=ConsEnd /STK=2 /UG=Dr.10111 /UG_TITLE=Danio rerio transcribed sequence with weak similarity to protein sp:P21145 (H.sapiens) MAL_HUMAN Myelin and lymphocyte protein  | zgc:101772                                           | zgc:101772   |
| Dr.26458.1.S1_at | 6.282 up  | 1.11196 | 3.7633 | gb:BC053206.1 /DB_XREF=gi:31419489 /TID=Dr.26458.1 /CNT=2 /FEA=FLmRNA /TIER=FL /STK=1 /UG=Dr.26458 /DEF=Danio rerio cDNA clone MGC:64022 IMAGE:6793152, complete cds. /PROD=Unknown (protein for MGC:64022) /FL=gb:BC053206.1                                   | zgc:64022                                            | zgc:64022    |
| Dr.6154.1.A1_at  | 5.869 up  | 6.82956 | 9.3828 | gb:AW232425 /DB_XREF=gi:6564728 /DB_XREF=fj19d05.x1 /TID=Dr.6154.1 /CNT=3 /FEA=EST /TIER=ConsEnd /STK=2 /UG=Dr.6154 /UG_TITLE=Danio rerio transcribed sequences                                                                                                 | wu:fj19d05                                           | wu:fj19d05   |
| Dr.23406.1.S1_at | 5.750 up  | 5.17411 | 7.6978 | gb:BQ450919 /DB_XREF=gi:21254031 /DB_XREF=fab12f06.y1 /CLONE=IMAGE:5903003 /TID=Dr.23406.1 /CNT=5 /FEA=EST /TIER=ConsEnd /STK=0 /UG=Dr.23406 /UG_TITLE=Danio rerio                                                                                              | hypothetical protein LOC100003142                    | LOC100003142 |

|                  |          |         |        |                                                                                                                                                                                                                                                                  |                                           |             |
|------------------|----------|---------|--------|------------------------------------------------------------------------------------------------------------------------------------------------------------------------------------------------------------------------------------------------------------------|-------------------------------------------|-------------|
|                  |          |         |        | transcribed sequences                                                                                                                                                                                                                                            |                                           |             |
| Dr.13050.1.S1_at | 5.740 up | 6.35908 | 8.8803 | gb:BI882315 /DB_XREF=gi:16089586 /DB_XREF=fm91f08.x1 /CLONE=IMAGE:44683358 /TID=Dr.13050.1 /CNT=6 /FEA=EST /TIER=ConsEnd /STK=1 /UG=Dr.13050 /UG_TITLE=Danio rerio transcribed sequence with weak similarity to protein ref:NP_003302.1 (H.sapiens) tumor suppre | zgc:110459                                | zgc:110459  |
| Dr.5925.1.A1_at  | 5.609 up | 7.02317 | 9.5111 | gb:BM104058 /DB_XREF=gi:17035128 /DB_XREF=fv42d12.x1 /CLONE=IMAGE:5411015 /TID=Dr.5925.1 /CNT=19 /FEA=EST /TIER=Stack /STK=18 /UG=Dr.5925 /UG_TITLE=Danio rerio transcribed sequences                                                                            | similar to conserved hypothetical protein | LOC559540   |
| Dr.19223.1.S1_at | 5.607 up | 5.26324 | 7.7505 | gb:AF533647.1 /DB_XREF=gi:22671693 /TID=Dr.19223.1 /CNT=271 /FEA=FLmRNA /TIER=FL+Stack /STK=20 /UG=Dr.19223 /DEF=Danio rerio aldolase C mRNA, complete cds. /PROD=aldolase C /FL=gb:AF533647.1 gb:BC053192.1                                                     | aldolase c, fructose-bisphosphate         | aldoc       |
| Dr.6820.1.A1_at  | 5.487 up | 7.39848 | 9.8547 | gb:BQ285243 /DB_XREF=gi:20653458 /DB_XREF=faa19f09.x1 /CLONE=IMAGE:5912993 /TID=Dr.6820.1 /CNT=8 /FEA=EST /TIER=ConsEnd /STK=2 /UG=Dr.6820 /UG_TITLE=Danio rerio transcribed sequences                                                                           | GTP binding protein 1, like               | gtbbp11     |
| Dr.2408.2.S1_at  | 5.372 up | 7.55329 | 9.9788 | gb:BM571242 /DB_XREF=gi:18853222 /DB_XREF=fw72a09.y1 /CLONE=IMAGE:5615896 /TID=Dr.2408.2 /CNT=15 /FEA=EST /TIER=ConsEnd /STK=0 /UG=Dr.2408 /UG_TITLE=Danio rerio transcribed sequence with moderate similarity to protein ref:NP_004521.1 (H.sapiens) matrix me  | matrix metalloproteinase 2                | mmp2        |
| Dr.2067.1.A1_at  | 5.371 up | 8.18526 | 10.61  | gb:BI884288 /DB_XREF=gi:16091559 /DB_XREF=fo21f05.x1 /CLONE=IMAGE:4628121 /TID=Dr.2067.1 /CNT=10 /FEA=EST /TIER=ConsEnd /STK=1 /UG=Dr.2067 /UG_TITLE=Danio rerio transcribed sequence with weak similarity to protein ref:NP_150601.1 (H.sapiens) p53-inducible  | zgc:158431                                | zgc:158431  |
| Dr.21044.1.S1_at | 5.359 up | 6.81373 | 9.2357 | gb:BC045855.1 /DB_XREF=gi:28279115 /TID=Dr.21044.1 /CNT=12 /FEA=FLmRNA /TIER=FL /STK=1 /UG=Dr.21044 /DEF=Danio rerio, Similar to cDNA sequence BC010311, clone MGC:56005 IMAGE:3819760, mRNA, complete cds. /PROD=Similar to cDNA sequence BC010311 /FL=gb:BC04  | zgc:56005                                 | zgc:56005   |
| Dr.21399.1.A1_at | 5.171 up | 5.95415 | 8.3248 | gb:AW305403 /DB_XREF=gi:6717798 /DB_XREF=fj64h06.x1 /TID=Dr.21399.1 /CNT=1 /FEA=EST /TIER=ConsEnd /STK=1 /UG=Dr.21399 /UG_TITLE=Danio rerio transcribed sequence with weak similarity to protein sp:Q16589 (H.sapiens) CGG2_HUMAN Cyclin G2                      | wu:fj64h06                                | wu:fj64h06  |
| Dr.24003.1.A1_at | 5.157 up | 1.78065 | 4.1474 | gb:CD601088 /DB_XREF=gi:31781964 /DB_XREF=RK131A1A08.T3 /CLONE=RK131A1A08 /TID=Dr.24003.1 /CNT=2 /FEA=EST /TIER=ConsEnd /STK=0 /UG=Dr.24003 /UG_TITLE=Danio rerio transcribed sequence with weak similarity to protein sp:Q03169 (H.sapiens) TNP2_HUMAN Tumor n  | hypothetical LOC565839                    | LOC565839   |
| Dr.1461.1.S1_at  | 4.728 up | 2.2293  | 4.4707 | gb:NM_131039.1 /DB_XREF=gi:18858638 /GEN=es1 /TID=Dr.1461.1 /CNT=91 /FEA=FLmRNA /TIER=FL+Stack /STK=40 /LL=30237 /UG=Dr.1461 /DEF=Danio rerio es1 protein (es1), mRNA. /PROD=es1 protein /FL=gb:U10403.1 gb:NM_131039.1                                          | es1                                       | es1 protein |
| Dr.14673.2.S1_at | 4.692 up | 6.49759 | 8.7279 | gb:BI866633 /DB_XREF=gi:16059766 /DB_XREF=ft58e04.y1 /CLONE=IMAGE:5157583 /TID=Dr.14673.2 /CNT=2 /FEA=EST /TIER=ConsEnd /STK=0 /UG=Dr.14673 /UG_TITLE=Danio rerio transcribed sequence with moderate similarity to protein pir:T12545 (H.sapiens) T12545 hypoth  | LYR motif containing 1                    | lyrm1       |
| Dr.2408.1.A1_at  | 4.367 up | 5.81152 | 7.9382 | gb:BQ075087 /DB_XREF=gi:19904124 /DB_XREF=fz27c04.x1 /TID=Dr.2408.1 /CNT=4 /FEA=EST /TIER=ConsEnd /STK=3                                                                                                                                                         | matrix metalloproteinase 2                | mmp2        |

|                  |          |         |        |                                                                                                                                                                                                                                                                 |                                                    |              |
|------------------|----------|---------|--------|-----------------------------------------------------------------------------------------------------------------------------------------------------------------------------------------------------------------------------------------------------------------|----------------------------------------------------|--------------|
|                  |          |         |        | /UG=Dr.2408 /UG_TITLE=Danio rerio transcribed sequence with moderate similarity to protein ref:NP_004521.1 (H.sapiens) matrix metalloproteinase 2 prep                                                                                                          |                                                    |              |
| Dr.7787.1.S1_at  | 4.334 up | 10.3421 | 12.458 | gb:BQ285781 /DB_XREF=gi:20654549 /DB_XREF=faa29h06.y1 /CLONE=IMAGE:5910755 /TID=Dr.7787.1 /CNT=130 /FEA=EST /TIER=Stack /STK=100 /UG=Dr.7787 /UG_TITLE=Danio rerio transcribed sequence with moderate similarity to protein sp:P42677 (H.sapiens) RS27_HUMAN 40 | zgc:136826                                         | zgc:136826   |
| Dr.1658.1.A1_at  | 4.175 up | 8.03356 | 10.096 | gb:BI885558 /DB_XREF=gi:16092829 /DB_XREF=fo73c12.x1 /CLONE=IMAGE:4725527 /TID=Dr.1658.1 /CNT=8 /FEA=EST /TIER=Stack /STK=8 /UG=Dr.1658 /UG_TITLE=Danio rerio transcribed sequences                                                                             | solute carrier family 4, anion exchanger, member 2 | slc4a2       |
| Dr.21979.1.A1_at | 4.144 up | 7.28216 | 9.3334 | gb:A1957502 /DB_XREF=gi:5750211 /DB_XREF=fc92e10.x1 /CLONE=IMAGE:3728874 /TID=Dr.21979.1 /CNT=1 /FEA=EST /TIER=ConsEnd /STK=1 /UG=Dr.21979 /UG_TITLE=Danio rerio transcribed sequence                                                                           | wu:fc92e10                                         | wu:fc92e10   |
| Dr.15033.1.S1_at | 4.011 up | 9.43101 | 11.435 | gb:BM571671 /DB_XREF=gi:18853653 /DB_XREF=fx04e11.x1 /CLONE=IMAGE:5618805 /TID=Dr.15033.1 /CNT=12 /FEA=EST /TIER=Stack /STK=6 /UG=Dr.15033 /UG_TITLE=Danio rerio transcribed sequence with weak similarity to protein sp:O60356 (H.sapiens) P8_HUMAN Protein p8 | CDNA clone IMAGE:6034066                           |              |
| Dr.58.1.A1_at    | 4.010 up | 8.62117 | 10.625 | gb:BM530947 /DB_XREF=gi:18739192 /DB_XREF=fw97g03.x1 /CLONE=IMAGE:5618477 /TID=Dr.58.1 /CNT=11 /FEA=EST /TIER=Stack /STK=9 /UG=Dr.58 /UG_TITLE=Danio rerio transcribed sequence with moderate similarity to protein sp:Q92569 (H.sapiens) P55G_HUMAN Phosphatid | zgc:73230                                          | zgc:73230    |
| Dr.16411.1.A1_at | 3.841 up | 4.72572 | 6.6674 | gb:BI474952 /DB_XREF=gi:15305593 /DB_XREF=fp55b12.x3 /CLONE=IMAGE:4760422 /TID=Dr.16411.1 /CNT=1 /FEA=EST /TIER=ConsEnd /STK=1 /UG=Dr.16411 /UG_TITLE=Danio rerio transcribed sequences                                                                         | hypothetical protein LOC100005489                  | LOC100005489 |
| Dr.14618.1.A1_at | 3.809 up | 1.06712 | 2.9967 | gb:BM185013 /DB_XREF=gi:17515971 /DB_XREF=fv16d05.x2 /CLONE=IMAGE:5386785 /TID=Dr.14618.1 /CNT=9 /FEA=EST /TIER=Stack /STK=9 /UG=Dr.14618 /UG_TITLE=Danio rerio transcribed sequences                                                                           | Transcribed locus                                  |              |
| Dr.22517.1.S1_at | 3.784 up | 4.88877 | 6.8087 | gb:AW232151 /DB_XREF=gi:6564454 /DB_XREF=fj14f10.x1 /TID=Dr.22517.1 /CNT=2 /FEA=EST /TIER=ConsEnd /STK=1 /UG=Dr.22517 /UG_TITLE=Danio rerio transcribed sequences                                                                                               | hypothetical LOC566223                             | LOC566223    |
| Dr.24260.1.S1_at | 3.644 up | 5.44426 | 7.31   | gb:NM_131619.1 /DB_XREF=gi:18859050 /GEN=mylz3 /TID=Dr.24260.1 /CNT=77 /FEA=FLmRNA /TIER=FL /STK=5 /LL=58143 /UG=Dr.24260 /DEF=Danio rerio myosin, light polypeptide 3, skeletal muscle (mylz3), mRNA. /PROD=myosin, light polypeptide 3, skeletal muscle /FL=g | myosin, light polypeptide 3, skeletal muscle       | mylz3        |
| Dr.15150.1.A1_at | 3.626 up | 5.89095 | 7.7494 | gb:BC045935.1 /DB_XREF=gi:28374425 /TID=Dr.15150.1 /CNT=8 /FEA=mRNA /TIER=ConsEnd /STK=0 /UG=Dr.15150 /UG_TITLE=Rerio, Similar to ADP-ribosyltransferase (NAD+; poly (ADP-ribose polymerase)-like 3, clone IMAGE:5411899, mRNA, partial cds /DEF=Danio rerio, S | poly (ADP-ribose) polymerase family, member 3      | parp3        |
| Dr.13633.1.A1_at | 3.501 up | 6.82327 | 8.6311 | gb:BQ078507 /DB_XREF=gi:19907544 /DB_XREF=fy81f06.x1 /CLONE=IMAGE:5777435 /TID=Dr.13633.1 /CNT=7 /FEA=EST /TIER=ConsEnd /STK=0 /UG=Dr.13633 /UG_TITLE=Danio rerio transcribed sequence with weak similarity to protein sp:P42167 (H.sapiens) THPB_HUMAN Thymopo | zgc:92287                                          | zgc:92287    |
| Dr.15781.1.S1_at | 3.321 up | 6.40824 | 8.1402 | gb:BC049319.1 /DB_XREF=gi:29179515 /TID=Dr.15781.1 /CNT=6 /FEA=FLmRNA /TIER=FL /STK=1 /UG=Dr.15781 /DEF=Danio rerio,                                                                                                                                            | vaccinia related kinase 2                          | vrk2         |

|                  |          |         |        |                                                                                                                                                                                                                                                                 |                                                             |                      |
|------------------|----------|---------|--------|-----------------------------------------------------------------------------------------------------------------------------------------------------------------------------------------------------------------------------------------------------------------|-------------------------------------------------------------|----------------------|
|                  |          |         |        | Similar to vaccinia related kinase 2, clone MGC:56483<br>IMAGE:5777078, mRNA, complete cds. /PROD=Similar to vaccinia related kinase 2 /FL=gb                                                                                                                   |                                                             |                      |
| Dr.16437.1.A1_at | 3.274 up | 7.1109  | 8.8221 | gb:BI878810 /DB_XREF=gi:16086081 /DB_XREF=fl83c03.x1 /CLONE=IMAGE:3820397 /TID=Dr.16437.1 /CNT=3 /FEA=EST /TIER=ConsEnd /STK=3 /UG=Dr.16437 /UG_TITLE=Danio rerio transcribed sequences                                                                         | hypothetical protein LOC792369                              | LOC792369            |
| Dr.5129.1.S1_at  | 3.176 up | 11.0461 | 12.713 | gb:BC045518.1 /DB_XREF=gi:28278959 /TID=Dr.5129.1 /CNT=25 /FEA=FLmRNA /TIER=FL+Stack /STK=8 /UG=Dr.5129 /DEF=Danio rerio, clone MGC:56722 IMAGE:2601412, mRNA, complete cds. /PROD=Unknown (protein for MGC:56722) /FL=gb:BC045518.1                            | sestrin 3                                                   | sesn3                |
| Dr.8145.1.S1_at  | 3.118 up | 7.97576 | 9.6168 | gb:NM_131433.1 /DB_XREF=gi:18858888 /GEN=igf2 /TID=Dr.8145.1 /CNT=5 /FEA=FLmRNA /TIER=FL /STK=4 /LL=30710 /UG=Dr.8145 /DEF=Danio rerio insulin-like growth factor 2 precursor (igf2), mRNA. /PROD=insulin-like growth factor 2 precursor /FL=gb:AF194333.1 gb:N | insulin-like growth factor 2a                               | igf2a                |
| Dr.9637.1.S1_at  | 3.062 up | 6.09638 | 7.7111 | gb:BC048040.1 /DB_XREF=gi:28856239 /TID=Dr.9637.1 /CNT=12 /FEA=FLmRNA /TIER=FL /STK=2 /UG=Dr.9637 /DEF=Danio rerio, Similar to small nuclear RNA activating complex, polypeptide 1, 43kDa, clone MGC:55475 IMAGE:2640216, mRNA, complete cds. /PROD=Similar to  | zgc:55475                                                   | zgc:55475            |
| Dr.20969.1.S1_at | 3.008 up | 7.85578 | 9.4446 | gb:AY204207.1 /DB_XREF=gi:28207738 /GEN=foxi1 /TID=Dr.20969.1 /CNT=2 /FEA=FLmRNA /TIER=FL /STK=1 /LL=353313 /UG=Dr.20969 /DEF=Danio rerio forkhead transcription factor i1 (foxi1) mRNA, complete cds. /PROD=forkhead transcription factor i1 /FL=gb:AY204207.1 | forkhead box I1                                             | foxi1                |
| Dr.18653.1.A1_at | 2.988 up | 5.6948  | 7.2742 | gb:BQ450381 /DB_XREF=gi:21253493 /DB_XREF=faa79e12.x1 /CLONE=IMAGE:5899895 /TID=Dr.18653.1 /CNT=1 /FEA=EST /TIER=ConsEnd /STK=1 /UG=Dr.18653 /UG_TITLE=Danio rerio transcribed sequence with weak similarity to protein sp:O14977 (H.sapiens) ODCI_HUMAN Ornith |                                                             |                      |
| Dr.26119.1.S1_at | 2.976 up | 4.46902 | 6.0428 | gb:CD596252 /DB_XREF=gi:31777604 /DB_XREF=RK100A4D07.T3 /CLONE=RK100A4D07 /TID=Dr.26119.1 /CNT=14 /FEA=EST /TIER=ConsEnd /STK=1 /UG=Dr.26119 /UG_TITLE=Danio rerio transcribed sequence with moderate similarity to protein pir:S21086 (H.sapiens) S21086 anion | solute carrier family 4, anion exchanger, member 2          | slc4a2               |
| Dr.4535.1.S1_at  | 2.848 up | 9.52571 | 11.036 | gb:BQ262830 /DB_XREF=gi:20463609 /DB_XREF=fz91e04.x1 /CLONE=IMAGE:5915982 /TID=Dr.4535.1 /CNT=27 /FEA=EST /TIER=Stack /STK=12 /UG=Dr.4535 /UG_TITLE=Danio rerio transcribed sequence with moderate similarity to protein ref:NP_116000.1 (H.sapiens) protein ty | protein tyrosine phosphatase type IVA, member 3             | ptp4a3               |
| Dr.17738.2.A1_at | 2.842 up | 4.60082 | 6.108  | gb:BQ092008 /DB_XREF=gi:20072820 /DB_XREF=fz35g10.x1 /CLONE=IMAGE:5905338 /TID=Dr.17738.2 /CNT=2 /FEA=EST /TIER=ConsEnd /STK=2 /UG=Dr.17738 /UG_TITLE=Danio rerio transcribed sequence with weak similarity to protein pir:A41735 (H.sapiens) A41735 hyaluronat | zgc:136830 (tumor necrosis factor, alpha-induced protein 6) | zgc:136830 (tnfaip6) |
| Dr.12918.1.S1_at | 2.752 up | 6.80113 | 8.262  | gb:BI983495 /DB_XREF=gi:16374089 /DB_XREF=ft72d03.x1 /CLONE=IMAGE:5158709 /TID=Dr.12918.1 /CNT=4 /FEA=EST /TIER=ConsEnd /STK=1 /UG=Dr.12918 /UG_TITLE=Danio rerio transcribed sequence with moderate similarity to protein sp:P49789 (H.sapiens) FHIT_HUMAN BIS | fragile histidine triad gene                                | fhit                 |
| Dr.15401.1.A1_at | 2.676 up | 6.85894 | 8.2792 | gb:BM530899 /DB_XREF=gi:18739108 /DB_XREF=fw97b07.x1 /CLONE=IMAGE:5618245 /TID=Dr.15401.1 /CNT=3 /FEA=EST /TIER=ConsEnd /STK=0 /UG=Dr.15401 /UG_TITLE=Danio rerio transcribed sequence with weak similarity to protein ref:NP_057570.1                          | hypothetical LOC557512                                      | LOC557512            |

|                  |          |         |        |                                                                                                                                                                                                                                                                 |                                                                                                                                                 |                                                                        |
|------------------|----------|---------|--------|-----------------------------------------------------------------------------------------------------------------------------------------------------------------------------------------------------------------------------------------------------------------|-------------------------------------------------------------------------------------------------------------------------------------------------|------------------------------------------------------------------------|
|                  |          |         |        | (H.sapiens) hypothetical                                                                                                                                                                                                                                        |                                                                                                                                                 |                                                                        |
| Dr.15379.1.A1_at | 2.634 up | 6.15029 | 7.5478 | gb:BM156105 /DB_XREF=gi:17239559 /DB_XREF=fv18h03.x2 /CLONE=IMAGE:5386997 /TID=Dr.15379.1 /CNT=2 /FEA=EST /TIER=ConsEnd /STK=2 /UG=Dr.15379 /UG_TITLE=Danio rerio transcribed sequences                                                                         | Transcribed locus                                                                                                                               |                                                                        |
| Dr.17738.1.S1_at | 2.594 up | 6.99473 | 8.37   | gb:BQ615550 /DB_XREF=gi:21605219 /DB_XREF=fab27g04.y1 /CLONE=IMAGE:5904582 /TID=Dr.17738.1 /CNT=6 /FEA=EST /TIER=ConsEnd /STK=0 /UG=Dr.17738 /UG_TITLE=Danio rerio transcribed sequence with weak similarity to protein pir:A41735 (H.sapiens) A41735 hyalurona | similar to Tumor necrosis factor-inducible protein TSG-6 precursor (TNF-stimulated gene 6 protein) (Hyaluronate-binding protein) /// zgc:136830 | LOC567311 /// zgc:136830                                               |
| Dr.5188.1.A1_at  | 2.504 up | 8.91738 | 10.242 | gb:BE201826 /DB_XREF=gi:8714000 /DB_XREF=f101d06.x1 /TID=Dr.5188.1 /CNT=8 /FEA=EST /TIER=Stack /STK=8 /UG=Dr.5188 /UG_TITLE=Danio rerio transcribed sequences                                                                                                   | hypothetical LOC568019                                                                                                                          | LOC568019                                                              |
| Dr.17362.1.A1_at | 2.470 up | 8.76811 | 10.073 | gb:BI984340 /DB_XREF=gi:16375685 /DB_XREF=fu12d10.x3 /CLONE=IMAGE:5305026 /TID=Dr.17362.1 /CNT=6 /FEA=EST /TIER=ConsEnd /STK=0 /UG=Dr.17362 /UG_TITLE=Danio rerio transcribed sequence with weak similarity to protein ref:NP_498857.1 (C.elegans) ZK353.1b.p ( | zgc:153047                                                                                                                                      | zgc:153047                                                             |
| Dr.2953.1.S1_at  | 2.456 up | 8.55976 | 9.8562 | gb:BC044471.1 /DB_XREF=gi:27881920 /TID=Dr.2953.1 /CNT=44 /FEA=FLmRNA /TIER=FL+Stack /STK=13 /UG=Dr.2953 /DEF=Danio rerio, Similar to RIKEN cDNA 1190017B18 gene, clone MGC:55750 IMAGE:3816468, mRNA, complete cds. /PROD=Similar to RIKEN cDNA 1190017B18 gen | RAS-like, family 11, member B                                                                                                                   | rasl11b                                                                |
| Dr.21094.1.A1_at | 2.428 up | 6.7843  | 8.0644 | gb:A1522563 /DB_XREF=gi:4436698 /DB_XREF=fb59d01.x1 /CLONE=IMAGE:3716161 /TID=Dr.21094.1 /CNT=1 /FEA=EST /TIER=ConsEnd /STK=1 /UG=Dr.21094 /UG_TITLE=Danio rerio transcribed sequence                                                                           | wu:fb59d01                                                                                                                                      | wu:fb59d01                                                             |
| Dr.13863.1.S1_at | 2.413 up | 6.83648 | 8.1077 | gb:BI841879 /DB_XREF=gi:15954402 /DB_XREF=fq54a04.y1 /CLONE=IMAGE:4879758 /TID=Dr.13863.1 /CNT=11 /FEA=EST /TIER=ConsEnd /STK=0 /UG=Dr.13863 /UG_TITLE=Danio rerio transcribed sequences                                                                        |                                                                                                                                                 |                                                                        |
| Dr.8295.2.A1_at  | 2.401 up | 7.07847 | 8.3422 | gb:AW171210 /DB_XREF=gi:6402813 /DB_XREF=fi39f08.x1 /CLONE=IMAGE:2640039 /TID=Dr.8295.2 /CNT=7 /FEA=EST /TIER=Stack /STK=7 /LL=30627 /UG_GENE=kns15 /UG=Dr.8295 /UG_TITLE=kinesin-like 5                                                                        | kinesin family member 23                                                                                                                        | kif23                                                                  |
| Dr.11084.1.A1_at | 2.359 up | 7.7216  | 8.96   | gb:BG306476 /DB_XREF=gi:13104003 /DB_XREF=fm56e03.x1 /CLONE=IMAGE:4199501 /TID=Dr.11084.1 /CNT=8 /FEA=EST /TIER=Stack /STK=8 /UG=Dr.11084 /UG_TITLE=Danio rerio transcribed sequence with moderate similarity to protein ref:NP_003774.1 (H.sapiens) UDP-Gal:be | zgc:76904                                                                                                                                       | zgc:76904                                                              |
| Dr.14673.1.A1_at | 2.343 up | 7.15827 | 8.387  | gb:AW077728 /DB_XREF=gi:6032880 /DB_XREF=fj36g10.y1 /TID=Dr.14673.1 /CNT=5 /FEA=EST /TIER=ConsEnd /STK=0 /UG=Dr.14673 /UG_TITLE=Danio rerio transcribed sequence with moderate similarity to protein pir:T12545 (H.sapiens) T12545 hypothetical protein DKFZp43 | LYR motif containing 1                                                                                                                          | lyrm1                                                                  |
| Dr.21039.1.S1_at | 2.330 up | 8.82228 | 10.043 | gb:BC045856.1 /DB_XREF=gi:28279649 /TID=Dr.21039.1 /CNT=11 /FEA=FLmRNA /TIER=FL /STK=1 /UG=Dr.21039 /DEF=Danio rerio, Similar to ribosomal protein S6 kinase polypeptide 3, clone MGC:56006 IMAGE:3819766, mRNA, complete cds. /PROD=Similar to ribosomal prote | ribosomal protein S6 kinase, polypeptide 3                                                                                                      | rps6ka3                                                                |
| Dr.18350.1.A1_at | 2.320 up | 5.49584 | 6.7103 | gb:AW342711 /DB_XREF=gi:6839077 /DB_XREF=fi85a11.x1 /CLONE=IMAGE:2644412 /TID=Dr.18350.1 /CNT=2 /FEA=EST /TIER=ConsEnd /STK=2 /UG=Dr.18350 /UG_TITLE=Danio rerio transcribed sequences                                                                          | Transcribed locus                                                                                                                               | The unigene has been retired. Can not find a new one or any other ESTs |

|                  |          |         |        |                                                                                                                                                                                                                                                                 |                                                                                 |            |
|------------------|----------|---------|--------|-----------------------------------------------------------------------------------------------------------------------------------------------------------------------------------------------------------------------------------------------------------------|---------------------------------------------------------------------------------|------------|
| Dr.10389.1.A1_at | 2.283 up | 5.48633 | 6.6773 | gb:BI430212 /DB_XREF=gi:15207444 /DB_XREF=fr84g10.x1 /CLONE=IMAGE:4967611 /TID=Dr.10389.1 /CNT=2 /FEA=EST /TIER=ConsEnd /STK=2 /UG=Dr.10389 /UG_TITLE=Danio rerio transcribed sequences                                                                         | tetraspanin 18a                                                                 | tspan18a   |
| Dr.236.1.S1_at   | 2.260 up | 8.81635 | 9.993  | gb:BI891065 /DB_XREF=gi:16098336 /DB_XREF=ZF637-3-000320 /CLONE=MpGp637_13B5;MPMGp637B0513 /TID=Dr.236.1 /CNT=4 /FEA=EST /TIER=ConsEnd /STK=0 /UG=Dr.236 /UG_TITLE=Danio rerio transcribed sequences                                                            | similar to LOC494737 protein                                                    | LOC559158  |
| Dr.24320.1.S1_at | 2.259 up | 9.07977 | 10.256 | gb:AF493988.1 /DB_XREF=gi:29468312 /GEN=nip3b /TID=Dr.24320.1 /CNT=3 /FEA=FLmRNA /TIER=FL /STK=1 /UG=Dr.24320 /DEF=Danio rerio BCL2adenovirus E1b 19 kDa interacting protein 3b (nip3b) mRNA, complete cds. /PROD=BCL2adenovirus E1b 19 kDa interacting protein | wu:fc54d07                                                                      | wu:fc54d07 |
| Dr.2052.1.S1_at  | 2.176 up | 11.054  | 12.176 | gb:NM_131327.1 /DB_XREF=gi:18859502 /GEN=tp53 /TID=Dr.2052.1 /CNT=49 /FEA=FLmRNA /TIER=FL+Stack /STK=12 /LL=30590 /UG=Dr.2052 /DEF=Danio rerio tumor protein p53 (tp53), mRNA. /PROD=tumor protein p53 /FL=gb:AF365873.1 gb:U60804.1 gb:NM_131327.1             | tumor protein p53                                                               | tp53       |
| Dr.1076.1.A1_at  | 2.149 up | 7.19318 | 8.2972 | gb:AW058871 /DB_XREF=gi:5934510 /DB_XREF=fe49f11.x1 /CLONE=IMAGE:3742221 /TID=Dr.1076.1 /CNT=13 /FEA=EST /TIER=Stack /STK=9 /UG=Dr.1076 /UG_TITLE=Danio rerio transcribed sequences                                                                             | wu:fa91f10                                                                      | wu:fa91f10 |
| Dr.8402.1.S1_at  | 2.132 up | 4.86814 | 5.9609 | gb:BM024651 /DB_XREF=gi:16539007 /DB_XREF=fu70e11.x1 /CLONE=IMAGE:5335004 /TID=Dr.8402.1 /CNT=4 /FEA=EST /TIER=ConsEnd /STK=2 /UG=Dr.8402 /UG_TITLE=Danio rerio transcribed sequences                                                                           | zgc:92043                                                                       | zgc:92043  |
| Dr.17874.1.A1_at | 2.116 up | 10.4543 | 11.536 | gb:AL717540 /DB_XREF=gi:20182143 /DB_XREF=AL717540 /CLONE=BN0AA027ZB04 /TID=Dr.17874.1 /CNT=3 /FEA=EST /TIER=ConsEnd /STK=1 /UG=Dr.17874 /UG_TITLE=Danio rerio transcribed sequences                                                                            | hypothetical LOC567015                                                          | LOC567015  |
| Dr.21646.1.A1_at | 2.109 up | 5.14329 | 6.2199 | gb:AI723147 /DB_XREF=gi:5041476 /DB_XREF=fc33b10.x1 /CLONE=IMAGE:3723163 /TID=Dr.21646.1 /CNT=1 /FEA=EST /TIER=ConsEnd /STK=1 /UG=Dr.21646 /UG_TITLE=Danio rerio transcribed sequence                                                                           | wu:fc33b10                                                                      | wu:fc33b10 |
| Dr.11137.1.A1_at | 2.103 up | 5.21251 | 6.2856 | gb:BG305657 /DB_XREF=gi:13103184 /DB_XREF=fm07d11.x1 /CLONE=IMAGE:4145708 /TID=Dr.11137.1 /CNT=6 /FEA=EST /TIER=ConsEnd /STK=4 /UG=Dr.11137 /UG_TITLE=Danio rerio transcribed sequence with moderate similarity to protein pir:A40138 (H.sapiens) A40138 glyco  | phosphorylase, glycogen; liver (Hers disease, glycogen storage disease type VI) | pygl       |
| Dr.26316.1.A1_at | 2.089 up | 5.93915 | 7.0023 | gb:CD606700 /DB_XREF=gi:31788052 /DB_XREF=RZ154A3F12.T7 /CLONE=RZ154A3F12 /TID=Dr.26316.1 /CNT=1 /FEA=EST /TIER=ConsEnd /STK=1 /UG=Dr.26316 /UG_TITLE=Danio rerio transcribed sequence                                                                          | Transcribed locus                                                               |            |
| Dr.2335.1.A1_at  | 2.057 up | 6.52703 | 7.568  | gb:A1958576 /DB_XREF=gi:5751289 /DB_XREF=fc93f10.x1 /CLONE=IMAGE:3728971 /TID=Dr.2335.1 /CNT=3 /FEA=EST /TIER=ConsEnd /STK=1 /UG=Dr.2335 /UG_TITLE=Danio rerio transcribed sequences                                                                            | wu:fc93f10                                                                      | wu:fc93f10 |
| Dr.17570.1.S3_at | 2.033 up | 8.92693 | 9.9506 | gb:CD285255 /DB_XREF=gi:31063031 /DB_XREF=G39163.12 /CLONE=IMAGE:6525555 /TID=Dr.17570.1 /CNT=67 /FEA=FLmRNA /TIER=ConsEnd /STK=0 /UG=Dr.17570 /UG_TITLE=Rerio, Similar to MAP kinase-interacting serinethreonine kinase 2, clone MGC:55351 IMAGE:2601420, mRNA | MAP kinase-interacting serine/threonine kinase 2                                | mknk2      |
| Dr.16048.1.S1_at | 2.030 up | 9.02135 | 10.043 | gb:BC045424.1 /DB_XREF=gi:28278350 /TID=Dr.16048.1 /CNT=9 /FEA=FLmRNA /TIER=FL /STK=1 /UG=Dr.16048 /DEF=Danio rerio,                                                                                                                                            | myelocytomatosis oncogene b                                                     | mycb       |

|                   |            |         |        |                                                                                                                                                                                                                                                                 |                                                                     |                            |
|-------------------|------------|---------|--------|-----------------------------------------------------------------------------------------------------------------------------------------------------------------------------------------------------------------------------------------------------------------|---------------------------------------------------------------------|----------------------------|
|                   |            |         |        | clone MGC:55680 IMAGE:3815601, mRNA, complete cds.<br>/PROD=Unknown (protein for MGC:55680) /FL=gb:BC045424.1                                                                                                                                                   |                                                                     |                            |
| Dr.3433.1.S1_at   | 2.024 up   | 6.26332 | 7.2808 | gb:BC045880.1 /DB_XREF=gi:28279134 /TID=Dr.3433.1 /CNT=23 /FEA=FLmRNA /TIER=FL /STK=4 /UG=Dr.3433 /DEF=Danio rerio, clone MGC:56042 IMAGE:3820149, mRNA, complete cds.<br>/PROD=Unknown (protein for MGC:56042) /FL=gb:BC045880.1                               | diaphorase (NADH) (cytochrome b-5 reductase)                        | dia1                       |
| Dr.17783.1.S1_at  | 2.020 up   | 7.71455 | 8.7296 | gb:AL902145 /DB_XREF=gi:23164704 /DB_XREF=AL902145 /CLONE=110-B08-2 /TID=Dr.17783.1 /CNT=6 /FEA=EST /TIER=ConsEnd /STK=0 /UG=Dr.17783 /UG_TITLE=Danio rerio transcribed sequence with weak similarity to protein ref:NP_060324.1 (H.sapiens) hypothetical prote | hypothetical LOC559491                                              | LOC559491                  |
| Dr.18818.1.A1_at  | 2.014 up   | 6.44249 | 7.4527 | gb:BQ618314 /DB_XREF=gi:21607983 /DB_XREF=faa59g12.x1 /CLONE=IMAGE:5898071 /TID=Dr.18818.1 /CNT=4 /FEA=EST /TIER=ConsEnd /STK=1 /UG=Dr.18818 /UG_TITLE=Danio rerio transcribed sequence with weak similarity to protein ref:NP_064579.1 (H.sapiens) GL004 prote | hypothetical protein LOC100000713                                   | LOC100000713               |
| Dr.8056.1.S1_at   | 2.011 up   | 8.34726 | 9.3555 | gb:AF116852.1 /DB_XREF=gi:4545251 /GEN=dkk1 /TID=Dr.8056.1 /CNT=3 /FEA=FLmRNA /TIER=FL /STK=1 /LL=30197 /UG=Dr.8056 /DEF=Danio rerio dickkopf-1 (dkk1) mRNA, complete cds.<br>/PROD=dickkopf-1 /FL=gb:AB023488.1 gb:AF116852.1                                  | dickkopf 1                                                          | dkk1                       |
|                   |            |         |        |                                                                                                                                                                                                                                                                 |                                                                     |                            |
|                   | 2.011 down | 7.29937 | 6.2908 | gb:BI880972 /DB_XREF=gi:16088243 /DB_XREF=fm82g09.x1 /CLONE=IMAGE:4234193 /TID=Dr.12968.1 /CNT=1 /FEA=EST /TIER=ConsEnd /STK=1 /UG=Dr.12968 /UG_TITLE=Danio rerio transcribed sequence                                                                          | NMDA receptor-regulated gene 1b                                     | narg1b                     |
| Dr.1152.1.A1_x_at | 2.013 down | 8.26305 | 7.2531 | gb:AI331812 /DB_XREF=gi:4068371 /DB_XREF=fb01h07.x1 /TID=Dr.1152.1 /CNT=2 /FEA=EST /TIER=ConsEnd /STK=2 /UG=Dr.1152 /UG_TITLE=Danio rerio transcribed sequences                                                                                                 | Transcribed locus                                                   |                            |
| Dr.25060.3.A1_at  | 2.018 down | 10.1998 | 9.1864 | gb:AL728672 /DB_XREF=gi:20193276 /DB_XREF=AL728672 /CLONE=BN0AA103ZD11 /TID=Dr.25060.3 /CNT=12 /FEA=EST /TIER=Stack /STK=6 /UG=Dr.25060 /UG_TITLE=Rerio, Similar to DnaJ (Hsp40) homolog, subfamily B, member 1, clone MGC:55492 IMAGE:2640711, mRNA, complete  | wu:fb53f04                                                          | wu:fb53f04                 |
| Dr.5372.7.A1_at   | 2.018 down | 6.25808 | 5.2448 | gb:AL722543 /DB_XREF=gi:20187147 /DB_XREF=AL722543 /CLONE=BN0AA060ZC05 /TID=Dr.5372.7 /CNT=31 /FEA=EST /TIER=Stack /STK=21 /UG=Dr.5372 /UG_TITLE=Rerio, Similar to hairy and enhancer of split 5 (Drosophila), clone MGC:55218 IMAGE:5916019, mRNA, complete cd | Transcribed locus                                                   |                            |
| Dr.4460.3.S1_at   | 2.037 down | 8.65129 | 7.6245 | gb:BQ481301 /DB_XREF=gi:21317268 /DB_XREF=faa74e05.y1 /CLONE=IMAGE:5899496 /TID=Dr.4460.3 /CNT=3 /FEA=EST /TIER=ConsEnd /STK=0 /UG=Dr.4460 /UG_TITLE=Danio rerio transcribed sequences                                                                          | hypothetical LOC558350 ///<br>hypothetical protein LOC792906        | LOC558350 ///<br>LOC792906 |
| Dr.4833.3.A1_a_at | 2.046 down | 10.6205 | 9.5873 | gb:BG302915 /DB_XREF=gi:13100442 /DB_XREF=f141c06.x1 /CLONE=IMAGE:3816203 /TID=Dr.4833.3 /CNT=27 /FEA=EST /TIER=Stack /STK=8 /UG=Dr.4833 /UG_TITLE=Rerio annexin 1c mRNA, complete cds                                                                          | kelch repeat-containing protein                                     | krcp                       |
| Dr.4460.1.A1_at   | 2.060 down | 9.22584 | 8.1829 | gb:CD606506 /DB_XREF=gi:31787858 /DB_XREF=RZ152A3B03.T7 /CLONE=RZ152A3B03 /TID=Dr.4460.1 /CNT=3 /FEA=EST /TIER=ConsEnd /STK=1 /UG=Dr.4460 /UG_TITLE=Danio rerio transcribed sequences                                                                           | hypothetical LOC558350 ///<br>hypothetical protein LOC792906        | LOC558350 ///<br>LOC792906 |
| Dr.2059.1.A1_at   | 2.062 down | 5.50299 | 4.4585 | gb:AW019704 /DB_XREF=gi:5873234 /DB_XREF=fd45h03.x1 /CLONE=IMAGE:3732725 /TID=Dr.2059.1 /CNT=4 /FEA=EST /TIER=ConsEnd /STK=2 /UG=Dr.2059 /UG_TITLE=Danio rerio                                                                                                  | solute carrier family 2 (facilitated glucose transporter), member 2 | slc2a2                     |



|                  |            |         |        |                                                                                                                                                                                                                                                                 |                                                                                          |                                                      |
|------------------|------------|---------|--------|-----------------------------------------------------------------------------------------------------------------------------------------------------------------------------------------------------------------------------------------------------------------|------------------------------------------------------------------------------------------|------------------------------------------------------|
|                  |            |         |        | transcribed sequences                                                                                                                                                                                                                                           |                                                                                          |                                                      |
| Dr.1050.1.S1_at  | 2.076 down | 12.2305 | 11.176 | gb:BM141327 /DB_XREF=gi:21631140 /DB_XREF=ZFT190 /TID=Dr.1050.1 /CNT=80 /FEA=EST /TIER=Stack /STK=29 /UG=Dr.1050 /UG_TITLE=Danio rerio transcribed sequence with weak similarity to protein prf:2003319A (H.sapiens) 2003319A ankyrin B:ISOTYPE=440kD (Homo sap | zgc:110113 /// hypothetical protein LOC792382                                            | LOC792382 /// zgc:110113                             |
| Dr.17100.1.A1_at | 2.143 down | 9.34875 | 8.2489 | gb:BM096039 /DB_XREF=gi:17025005 /DB_XREF=fv29h06.x1 /CLONE=IMAGE:5410042 /TID=Dr.17100.1 /CNT=7 /FEA=EST /TIER=ConsEnd /STK=1 /UG=Dr.17100 /UG_TITLE=Danio rerio transcribed sequence with moderate similarity to protein pir:A49651 (H.sapiens) A49651 replic | similar to RFC1 protein /// similar to replication factor C large subunit /// zgc:162875 | LOC558276 /// LOC560984 /// LOC797142 /// zgc:162875 |
| Dr.5434.1.S2_at  | 2.144 down | 6.09442 | 4.9939 | gb:AL719176 /DB_XREF=gi:20183780 /DB_XREF=AL719176 /CLONE=BN0AA039ZB03 /TID=Dr.5434.1 /CNT=262 /FEA=FLmRNA /TIER=Stack /STK=33 /LL=64264 /UG_GENE=plp1 /UG=Dr.5434 /UG_TITLE=proteolipid protein 1 /FL=gb:AY070259.1 gb:NM_175576.2                             | proteolipid protein 1a /// similar to DMalpha1                                           | LOC100006173 /// plp1a                               |
| Dr.26546.1.A1_at | 2.152 down | 9.77304 | 8.6668 | gb:AW154320 /DB_XREF=gi:6202222 /DB_XREF=fi26d05.x1 /CLONE=IMAGE:2602281 /TID=Dr.26546.1 /CNT=7 /FEA=EST /TIER=Stack /STK=6 /UG=Dr.26546 /UG_TITLE=Danio rerio transcribed sequence with moderate similarity to protein ref:NP_060533.1 (H.sapiens) hypothetica | PASG                                                                                     | LOC553328                                            |
| Dr.835.1.A1_at   | 2.191 down | 8.20296 | 7.0713 | gb:A1397346 /DB_XREF=gi:4227239 /DB_XREF=fb10c12.x1 /TID=Dr.835.1 /CNT=4 /FEA=EST /TIER=ConsEnd /STK=3 /UG=Dr.835 /UG_TITLE=Danio rerio transcribed sequence with weak similarity to protein sp:O00764 (H.sapiens) PDXK_HUMAN Pyridoxine kinase (Pyridoxal kina | zgc:101900                                                                               | zgc:101900                                           |
| Dr.21089.1.S1_at | 2.219 down | 6.9144  | 5.7642 | gb:A1522533 /DB_XREF=gi:4436668 /DB_XREF=fb59a01.x1 /CLONE=IMAGE:3716136 /TID=Dr.21089.1 /CNT=5 /FEA=EST /TIER=ConsEnd /STK=0 /UG=Dr.21089 /UG_TITLE=Danio rerio transcribed sequences                                                                          | wu:fb59a01 (New unigene ID:Dr.121717)                                                    | wu:fb59a01                                           |
| Dr.14899.1.A1_at | 2.442 down | 7.45568 | 6.1675 | gb:BM183317 /DB_XREF=gi:17514275 /DB_XREF=ft62h11.x2 /CLONE=IMAGE:5158125 /TID=Dr.14899.1 /CNT=2 /FEA=EST /TIER=ConsEnd /STK=2 /UG=Dr.14899 /UG_TITLE=Danio rerio transcribed sequence with weak similarity to protein pir:T15848 (C.elegans) T15848 hypothetic | zgc:110173                                                                               | zgc:110173                                           |
| Dr.16859.1.S1_at | 2.481 down | 9.71101 | 8.3996 | gb:BC044191.1 /DB_XREF=gi:28278646 /TID=Dr.16859.1 /CNT=18 /FEA=FLmRNA /TIER=FL /STK=1 /UG=Dr.16859 /DEF=Danio rerio, Similar to RIKEN cDNA 2010012F05 gene, clone MGC:55566 IMAGE:2642927, mRNA, complete cds. /PROD=Similar to RIKEN cDNA 2010012F05 gene /FL | chromatin modifying protein 4B                                                           | chmp4b                                               |
| Dr.1754.1.S1_at  | 2.517 down | 10.3384 | 9.0063 | gb:B1984378 /DB_XREF=gi:16375759 /DB_XREF=fu13g10.x3 /CLONE=IMAGE:5305171 /TID=Dr.1754.1 /CNT=18 /FEA=EST /TIER=Stack /STK=6 /UG=Dr.1754 /UG_TITLE=Danio rerio transcribed sequence with weak similarity to protein pdb:3GTU (H.sapiens) B Chain B, Ligand-Free | glutathione S-transferase M                                                              | gstm                                                 |
| Dr.26463.1.S1_at | 2.544 down | 8.56712 | 7.2198 | gb:BC053151.1 /DB_XREF=gi:31419434 /TID=Dr.26463.1 /CNT=3 /FEA=FLmRNA /TIER=FL /STK=1 /UG=Dr.26463 /DEF=Danio rerio cDNA clone MGC:63927 IMAGE:6790897, complete cds. /PROD=Unknown (protein for MGC:63927) /FL=gb:BC053151.1                                   | B lymphoma Mo-MLV insertion region 1b                                                    | bmi1b                                                |
| Dr.6897.1.S1_at  | 2.567 down | 6.60619 | 5.2457 | gb:AW059176 /DB_XREF=gi:5934815 /DB_XREF=fe26f03.x1 /CLONE=IMAGE:3739997 /TID=Dr.6897.1 /CNT=2 /FEA=EST /TIER=ConsEnd /STK=1 /UG=Dr.6897 /UG_TITLE=Danio rerio transcribed sequence with weak similarity to protein pdb:1LBG (E. coli) B Chain B, Lactose Opero | zgc:109937                                                                               | zgc:109937                                           |

|                  |            |         |        |                                                                                                                                                                                                                                                                 |                                                                                                                   |                                             |
|------------------|------------|---------|--------|-----------------------------------------------------------------------------------------------------------------------------------------------------------------------------------------------------------------------------------------------------------------|-------------------------------------------------------------------------------------------------------------------|---------------------------------------------|
| Dr.18282.6.A1_at | 2.588 down | 9.04577 | 7.6735 | gb:BQ616996 /DB_XREF=gi:21606665 /DB_XREF=fab02h08.x1 /CLONE=IMAGE:6034407 /TID=Dr.18282.6 /CNT=18 /FEA=EST /TIER=Stack /STK=9 /LL=30082 /UG_GENE=p62 /UG=Dr.18282 /UG_TITLE=GAP-associated phosphoprotein p62                                                  | similar to KH domain containing, RNA binding, signal transduction associated 1                                    | LOC100007538                                |
| Dr.11994.1.A1_at | 2.634 down | 8.29704 | 6.8995 | gb:BI880384 /DB_XREF=gi:16087655 /DB_XREF=fm71c10.x1 /CLONE=IMAGE:4200954 /TID=Dr.11994.1 /CNT=4 /FEA=EST /TIER=ConsEnd /STK=4 /UG=Dr.11994 /UG_TITLE=Danio rerio transcribed sequence with weak similarity to protein ref:NP_504711.1 (C.elegans) T25F10.5.p ( | zgc:136718                                                                                                        | zgc:136718 (newly appointed ttc8)           |
| Dr.26309.1.A1_at | 2.642 down | 5.95035 | 4.5484 | gb:CD606605 /DB_XREF=gi:31787957 /DB_XREF=RZ153A3B07.T7 /CLONE=RZ153A3B07 /TID=Dr.26309.1 /CNT=1 /FEA=EST /TIER=ConsEnd /STK=1 /UG=Dr.26309 /UG_TITLE=Danio rerio transcribed sequence                                                                          | Transcribed locus                                                                                                 |                                             |
| Dr.11520.1.S1_at | 2.652 down | 10.2228 | 8.8152 | gb:BI671229 /DB_XREF=gi:15586613 /DB_XREF=fp62f04.x1 /CLONE=IMAGE:4786687 /TID=Dr.11520.1 /CNT=165 /FEA=EST /TIER=ConsEnd /STK=1 /UG=Dr.11520 /UG_TITLE=Danio rerio transcribed sequence with weak similarity to protein pir:S57447 (H.sapiens) S57447 HPBR11-7 | si:ch211-51e12.7                                                                                                  | si:ch211-51e12.7                            |
| Dr.13445.1.A1_at | 2.708 down | 2.21329 | 0.7757 | gb:BI864822 /DB_XREF=gi:16057955 /DB_XREF=ft17g01.x1 /CLONE=IMAGE:5082024 /TID=Dr.13445.1 /CNT=1 /FEA=EST /TIER=ConsEnd /STK=1 /UG=Dr.13445 /UG_TITLE=Danio rerio transcribed sequences                                                                         | zgc:158271                                                                                                        | zgc:158271                                  |
| Dr.18577.1.S2_at | 2.711 down | 9.92248 | 8.4837 | gb:BC045878.1 /DB_XREF=gi:28277808 /TID=Dr.18577.1 /CNT=13 /FEA=FLmRNA /TIER=ConsEnd /STK=0 /UG=Dr.18577 /UG_TITLE=Rerio cyclin dependent kinase 8 mRNA, complete cds /DEF=Danio rerio, Similar to cyclin-dependent kinase 8, clone IMAGE:3820094, mRNA. /FL=gb | cyclin-dependent kinase 8                                                                                         | cdk8                                        |
| Dr.17277.1.S1_at | 2.758 down | 9.23245 | 7.7687 | gb:BM776755 /DB_XREF=gi:19106369 /DB_XREF=fy45d01.x1 /CLONE=IMAGE:5602609 /TID=Dr.17277.1 /CNT=2 /FEA=EST /TIER=ConsEnd /STK=1 /UG=Dr.17277 /UG_TITLE=Danio rerio transcribed sequences                                                                         | hypothetical LOC573492                                                                                            | LOC573492                                   |
| Dr.16643.1.S1_at | 2.760 down | 5.88253 | 4.4174 | gb:BI979940 /DB_XREF=gi:16367163 /DB_XREF=ft77h10.x1 /CLONE=IMAGE:5159658 /TID=Dr.16643.1 /CNT=3 /FEA=EST /TIER=ConsEnd /STK=1 /UG=Dr.16643 /UG_TITLE=Danio rerio transcribed sequences                                                                         | hypothetical protein LOC793111                                                                                    | LOC793111                                   |
| Dr.17328.1.S1_at | 2.782 down | 10.6294 | 9.153  | gb:BC044536.1 /DB_XREF=gi:27882550 /TID=Dr.17328.1 /CNT=15 /FEA=FLmRNA /TIER=FL /STK=3 /UG=Dr.17328 /DEF=Danio rerio, Similar to hypothetical protein FLJ10374, clone MGC:55914 IMAGE:3818982, mRNA, complete cds. /PROD=Similar to hypothetical protein FLJ103 | coiled-coil domain containing 94<br>/// hypothetical LOC554591<br>/// similar to Coiled-coil domain containing 94 | ccdc94 ///<br>LOC100003459 ///<br>LOC554591 |
| Dr.20083.1.A1_at | 2.813 down | 7.9067  | 6.4143 | gb:BI705726 /DB_XREF=gi:15681421 /DB_XREF=fp24d06.x3 /CLONE=IMAGE:4743995 /TID=Dr.20083.1 /CNT=6 /FEA=EST /TIER=ConsEnd /STK=4 /UG=Dr.20083 /UG_TITLE=Danio rerio transcribed sequences                                                                         | cyclin G2                                                                                                         | ccng2                                       |
| Dr.10051.1.A1_at | 2.977 down | 7.81205 | 6.2379 | gb:BM736017 /DB_XREF=gi:19057350 /DB_XREF=TDsubC_2C2_T7 /CLONE=TDsubC_2C2 /TID=Dr.10051.1 /CNT=9 /FEA=EST /TIER=ConsEnd /STK=0 /UG=Dr.10051 /UG_TITLE=Danio rerio transcribed sequence with moderate similarity to protein sp:Q16589 (H.sapiens) CGG2_HUMAN Cyc | cyclin G2                                                                                                         | ccng2                                       |
| Dr.3368.1.S1_at  | 3.002 down | 8.22784 | 6.6416 | gb:BC045984.1 /DB_XREF=gi:28277909 /TID=Dr.3368.1 /CNT=16 /FEA=FLmRNA /TIER=FL+Stack /STK=7 /UG=Dr.3368 /DEF=Danio rerio, Similar to AD034 protein, clone MGC:56195 IMAGE:5413872, mRNA, complete cds. /PROD=Similar to AD034 protein /FL=gb:BC045984.1         | RIO kinase 1 (yeast)                                                                                              | riok1                                       |

|                    |            |         |        |                                                                                                                                                                                                                                                                 |                                     |                      |
|--------------------|------------|---------|--------|-----------------------------------------------------------------------------------------------------------------------------------------------------------------------------------------------------------------------------------------------------------------|-------------------------------------|----------------------|
| Dr.13364.1.S1_at   | 3.193 down | 7.50363 | 5.8285 | gb:BI890127 /DB_XREF=gi:16097398 /DB_XREF=ZF637-2-001882 /CLONE=MPMGP637_4O8;MPMGP637O084 /TID=Dr.13364.1 /CNT=2 /FEA=EST /TIER=ConsEnd /STK=0 /UG=Dr.13364 /UG_TITLE=Danio rerio transcribed sequence with weak similarity to protein ref.NP_079483.1 (H.sapie | zgc:91843                           | zgc:91843            |
| Dr.7377.1.A1_at    | 3.304 down | 8.15446 | 6.4299 | gb:BQ169354 /DB_XREF=gi:20376782 /DB_XREF=STR00302 /CLONE=CB259 /TID=Dr.7377.1 /CNT=5 /FEA=EST /TIER=ConsEnd /STK=4 /UG=Dr.7377 /UG_TITLE=Danio rerio transcribed sequences                                                                                     | hypothetical LOC569976              | LOC569976            |
| Dr.987.1.S1_at     | 3.585 down | 9.37431 | 7.5321 | gb:A1883475 /DB_XREF=gi:5588639 /DB_XREF=fc64f12.y1 /CLONE=IMAGE:3726191 /TID=Dr.987.1 /CNT=13 /FEA=mRNA /TIER=ConsEnd /STK=0 /UG=Dr.987 /UG_TITLE=Rerio, clone IMAGE:5604458, mRNA                                                                             | zgc:136578                          | zgc:136578           |
| Dr.4833.1.S1_at    | 3.641 down | 12.5345 | 10.67  | gb:AY178795.1 /DB_XREF=gi:27762259 /TID=Dr.4833.1 /CNT=63 /FEA=FLmRNA /TIER=FL+Stack /STK=11 /UG=Dr.4833 /DEF=Danio rerio annexin 1c mRNA, complete cds. /PROD=annexin 1c /FL=gb:AY178795.1                                                                     | annexin A1c /// zgc:86853           | anxa1c /// zgc:86853 |
| Dr.23837.1.A1_s_at | 3.909 down | 10.277  | 8.31   | gb:A1667265 /DB_XREF=gi:4805621 /DB_XREF=fc38e02.x1 /CLONE=IMAGE:3723674 /TID=Dr.23837.1 /CNT=1 /FEA=EST /TIER=ConsEnd /STK=1 /UG=Dr.23837 /UG_TITLE=Danio rerio transcribed sequence with weak similarity to protein pir:A39242 (H.sapiens) A39242 DNA topoiso | similar to DNA topoisomerasell_beta | LOC569877            |
| Dr.7298.1.S1_at    | 3.920 down | 6.77039 | 4.7993 | gb:BC044176.1 /DB_XREF=gi:28278641 /TID=Dr.7298.1 /CNT=13 /FEA=FLmRNA /TIER=FL /STK=1 /UG=Dr.7298 /DEF=Danio rerio, Similar to G protein beta subunit-like, clone MGC:55455 IMAGE:2639838, mRNA, complete cds. /PROD=Similar to G protein beta subunit-like /FL | hypothetical protein LOC792689      | LOC792689            |
| Dr.14049.1.S1_at   | 4.145 down | 7.55406 | 5.5026 | gb:B1429488 /DB_XREF=gi:15206720 /DB_XREF=fr70e05.y1 /CLONE=IMAGE:4965993 /TID=Dr.14049.1 /CNT=15 /FEA=EST /TIER=ConsEnd /STK=0 /UG=Dr.14049 /UG_TITLE=Danio rerio transcribed sequences                                                                        | zgc:158667                          | zgc:158667           |
| Dr.12881.1.A1_at   | 4.181 down | 6.1633  | 4.0994 | gb:BI880356 /DB_XREF=gi:16087627 /DB_XREF=fm75h07.x1 /CLONE=IMAGE:4201572 /TID=Dr.12881.1 /CNT=1 /FEA=EST /TIER=ConsEnd /STK=1 /UG=Dr.12881 /UG_TITLE=Danio rerio transcribed sequence                                                                          | Transcribed locus                   |                      |
| Dr.8365.1.A1_at    | 4.995 down | 8.21272 | 5.8921 | gb:AA542584 /DB_XREF=gi:2289519 /DB_XREF=fa08c06.s1 /CLONE=6M18 /TID=Dr.8365.1 /CNT=1 /FEA=EST /TIER=ConsEnd /STK=1 /UG=Dr.8365 /UG_TITLE=Danio rerio transcribed sequence                                                                                      | zgc:55455                           | zgc:55455            |
| Dr.18485.2.A1_at   | 5.585 down | 4.58433 | 2.1027 | gb:AL913284 /DB_XREF=gi:23178554 /DB_XREF=AL913284 /CLONE=201-F05-2 /TID=Dr.18485.2 /CNT=1 /FEA=EST /TIER=ConsEnd /STK=1 /UG=Dr.18485 /UG_TITLE=Danio rerio transcribed sequence with weak similarity to protein ref.NP_055478.1 (H.sapiens) KIAA0677 gene prod | si:ch211-124a3.4                    | si:ch211-124a3.4     |
| Dr.1470.1.S1_at    | 8.199 down | 3.94783 | 0.9123 | gb:NM_131324.1 /DB_XREF=gi:24158432 /GEN=pax7a /TID=Dr.1470.1 /CNT=2 /FEA=FLmRNA /TIER=FL /STK=2 /LL=30587 /UG=Dr.1470 /DEF=Danio rerio paired box gene 7a (pax7a), mRNA. /PROD=paired box gene 7a /FL=gb:NM_131324.1 gb:AF014367.1                             | paired box gene 7                   | pax7                 |
| Dr.25499.1.S1_at   | 9.241 down | 6.4055  | 3.1974 | gb:BC053274.1 /DB_XREF=gi:31418956 /TID=Dr.25499.1 /CNT=5 /FEA=FLmRNA /TIER=FL /STK=1 /UG=Dr.25499 /DEF=Danio rerio cDNA clone MGC:64136 IMAGE:6796873, complete cds. /PROD=Unknown (protein for MGC:64136) /FL=gb:BC053274.1                                   | zgc:64136                           | zgc:64136            |
