# Supplementary material
Source: PubMed Central journal article supplement (PMC2875841)
Supplement: supp_137.12.1981_DEV048439tableS2.pdf [file supp_137.12.1981_DEV048439tableS2.pdf]

**Table S2. Sequence of antisense morpholino oligonucleotides**

| Name          | Sequence (5'-3')          |
|---------------|---------------------------|
| 5'UTR Ovo1 MO | TCTCCCCGCTATCTCTCAAATTA   |
| ATG Ovo1 MO   | CTCGTGGCATGGTCTATTCCCGACG |
| Ncad MO       | TCTGTATAAAGAAACCGATAGAGTT |
| p53 MO        | AGAATTGATTTGCCGACCTCCTCT  |
| Rab11Fip2 MO  | ACATAATTCACGTCCTCACCTTC   |
