# Supplementary material
Source: PubMed Central journal article supplement (PMC2875841)
Supplement: supp_137.12.1981_DEV048439tableS3.pdf [file supp_137.12.1981_DEV048439tableS3.pdf]

**Table S3. Sequence of primers**

| Name                                    | Sequence (5'-3')             |
|-----------------------------------------|------------------------------|
| TOPO- <i>rab3c</i> sense                | GCTGCTACGCAAGACAACAA         |
| TOPO- <i>rab3c</i> antisense            | CACAACCGCATACAAACAGG         |
| TOPO- <i>rab11fip2</i> sense            | GTGTAGCGGCCTACAGCAAT         |
| TOPO- <i>rab11fip2</i> antisense        | AATTGACAGCTCAAAGGAATCTT      |
| TOPO- <i>sec6</i> sense                 | TGAGAGATCTGCGGTGTA           |
| TOPO- <i>sec6</i> antisense             | CACGGCTCAGGCCTAGATTT         |
| pCS2+ <i>rab12</i> sense                | GGGAATTCATGGAGTCGGGCTTCGGGGT |
| pCS2+ <i>rab12</i> antisense            | GGCTCGAGACAGCAGCGCATGCGTGGCG |
| qPCR <i>ef1a</i> sense                  | CAAGGGATGGAAGATTGAGC         |
| qPCR <i>ef1a</i> antisense              | AACCATACCAGGCTTGAGGA         |
| qPCR <i>ovo1</i> sense                  | ACGAGCTTTCCTGGTGAAGA         |
| qPCR <i>ovo1</i> antisense              | CGGTCTTTGTGTGTGGACAG         |
| qPCR <i>ovo2</i> sense                  | CAAGAGACACCCCTGCAGAT         |
| qPCR <i>ovo2</i> antisense              | CTGCACACCGTGGATCTTAC         |
| qPCR <i>axin2</i> sense                 | AGAAGATGACCCACGTCCAC         |
| qPCR <i>axin2</i> antisense             | AGAAGATGACCCACGTCCAC         |
| qPCR <i>rab3c</i> sense                 | AGCGTCGGGAAAACATCCTT         |
| qPCR <i>rab3c</i> antisense             | CCCATGGCCCCTCTGTAGTA         |
| qPCR <i>rab12</i> sense                 | GGTGCCAAAGGCATTGTTTT         |
| qPCR <i>rab12</i> antisense             | TCCGTGAAGCAAACCTCTCA         |
| qPCR <i>rab11fip2</i> sense             | GCTCATATTCGGGAGTTGGA         |
| qPCR <i>rab11fip2</i> antisense         | AATCCCAGGTGACACTCCAG         |
| qPCR <i>sec6</i> sense                  | AGTGCTGAACGACAGGCTTT         |
| qPCR <i>sec6</i> antisense              | CAGATGATTCTGCCCTCAT          |
| qPCR <i>rab25</i> sense                 | GGAAAGAGCAACCTGCTGTC         |
| qPCR <i>rab25</i> antisense             | GCTCCACGCTCTCATAGGTC         |
| pCS2 <i>rab11fip2</i> ORF sense         | ggctcgagATGTCATTGGGCGAACAGTC |
| pCS2 <i>rab11fip2</i> ORF antisense     | ggctcgagCTTTTTCGAGATCTTCCAG  |
| <i>pac</i> <sup>par2.10</sup> sense     | CAGAGAGAGACGGAGGAACG         |
| <i>pac</i> <sup>par2.10</sup> antisense | GAACTTGTCCTCGGTGATG          |
| <i>rab11fip2</i> -MO sense              | ACGGGCACGCAGAAACTCTC         |
| <i>rab11fip2</i> -MO antisense          | AGGGATTGCGGTTACGTGGA         |
